# Supplementary material
Source: PubMed Central journal article supplement (PMC3887914)
Supplement: molcell-35-3-202-4-supplementary.pdf [file molcell-35-3-202-4-supplementary.pdf]

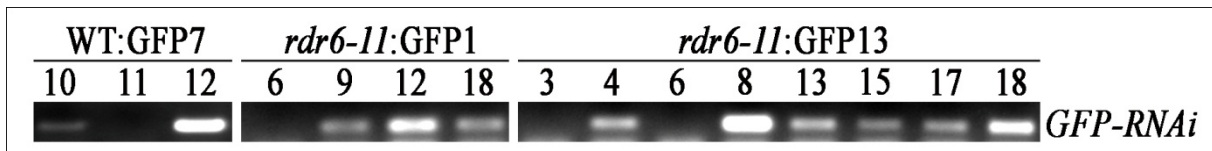

Rikno Harmoko et al.,

**Supplementary Figure 1. Expression of GFP-RNAi in WT and *rdr6-11* backgrounds**

RT-PCR was performed using a primer set for the intron between the antisense- and sense-GFP in the GFP-RNAi construct. Expression of the GFP-RNAi was measured in the T1 generation of GFP-RNAi transformants with GFP-expressing WT and *rdr6-11* backgrounds.
